# Supplementary material for: Enhanced light harvesting in lead-free Cs 2 AgBiBr 6 double perovskite solar cells with plasmonic Ag nanoparticles
Source: Royal Society of Chemistry journal article supplement (doi:10.1039/d4tc05218h), 2025-01-01
Supplement: d4tc05218h1.pdf [file d4tc05218h1.pdf]

## Supporting Information

### Enhanced Light Harvesting in Lead-Free Cs<sub>2</sub>AgBiBr<sub>6</sub> Double Perovskite Solar Cells with Plasmonic Ag Nanoparticles

Yanyan Duan,<sup>ab</sup> Jiangning Li,<sup>a</sup> Biao Wang,<sup>a</sup> Qiong Li,<sup>a</sup> Zhiheng Wu,<sup>a</sup> Jing Mao,<sup>a</sup> Wei Zhang,<sup>ac</sup> Guosheng Shao,<sup>\*ad</sup> and Yonglong Shen<sup>\*ad</sup>

*<sup>a</sup> State Center for International Cooperation on Designer Low-carbon & Environmental Materials, School of Materials Science and Engineering, Zhengzhou University, Zhengzhou 450001, China*

*<sup>b</sup> Henan Ancai Hi-tech Co., Ltd., Anyang 455000, China*

*<sup>c</sup> Advanced Technology Institute, Department of Electrical and Electronic Engineering, University of Surrey, Guildford GU2 7XH, UK*

*<sup>d</sup> Zhengzhou Materials Genome Institute (ZMGI), Zhengzhou 450100, China*

Email: gsshao@zzu.edu.cn, shenyonglong@zzu.edu.cn

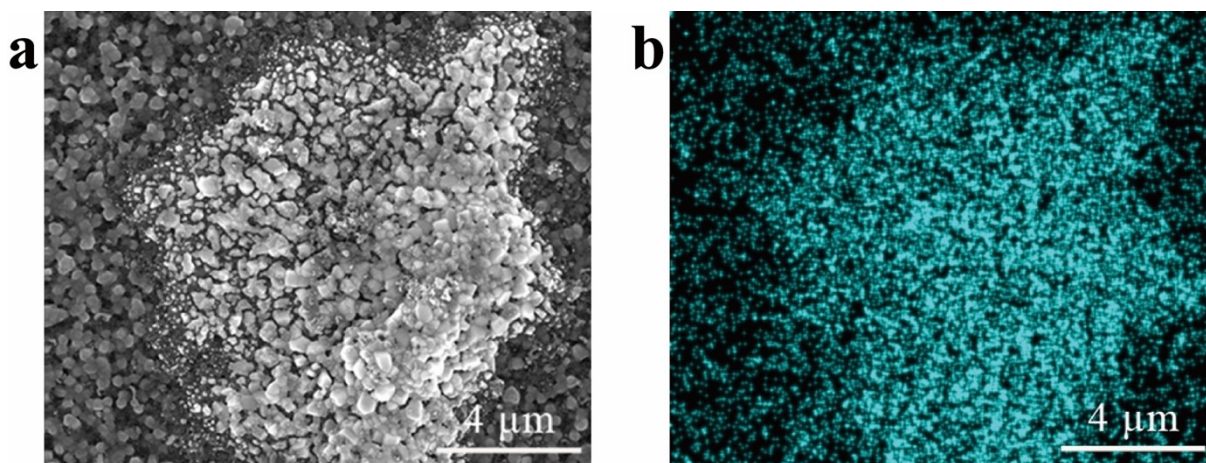

**Fig. S1** (a) SEM image and (b) EDS mapping of perovskite film treated with a higher Ag concentration (30 mg/L).

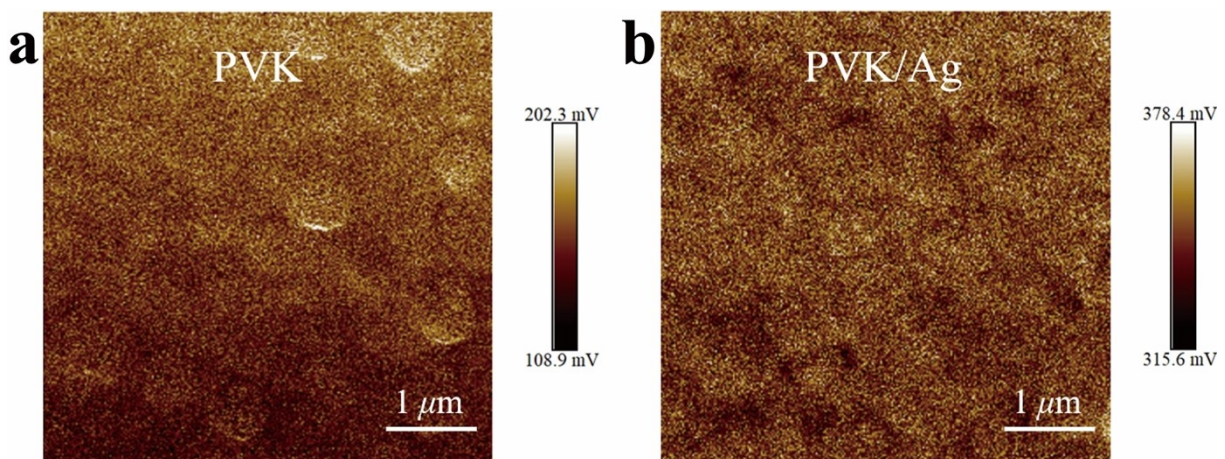

**Fig. S2** Surface potential of perovskite films (a) without and (b) with Ag NPs.

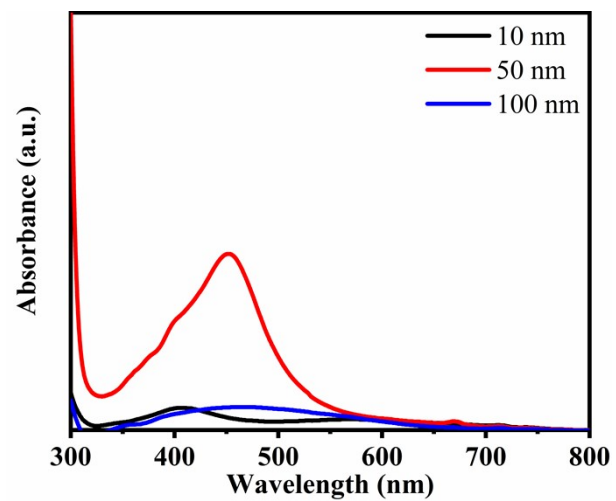

**Fig. S3** UV-vis absorption spectra of Ag NPs with different sizes.

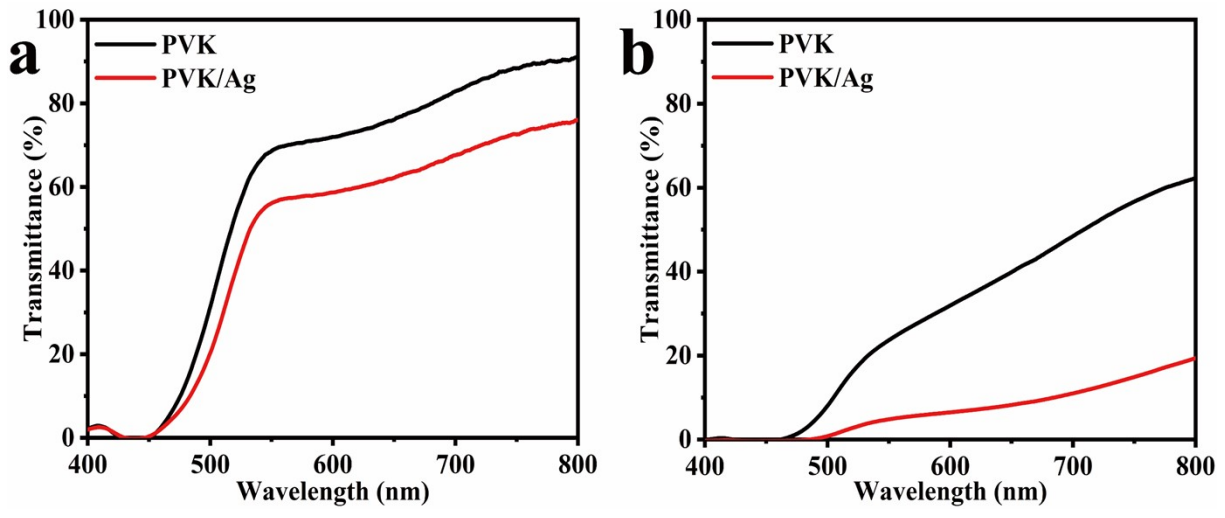

**Fig. S4** (a) TT and (b) VT spectra of perovskite films without and with Ag NPs.

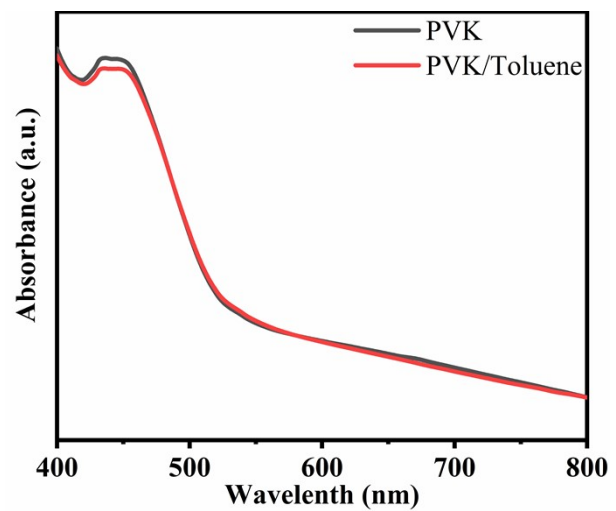

**Fig. S5** UV-vis absorption spectra of perovskite films without and with toluene modification.

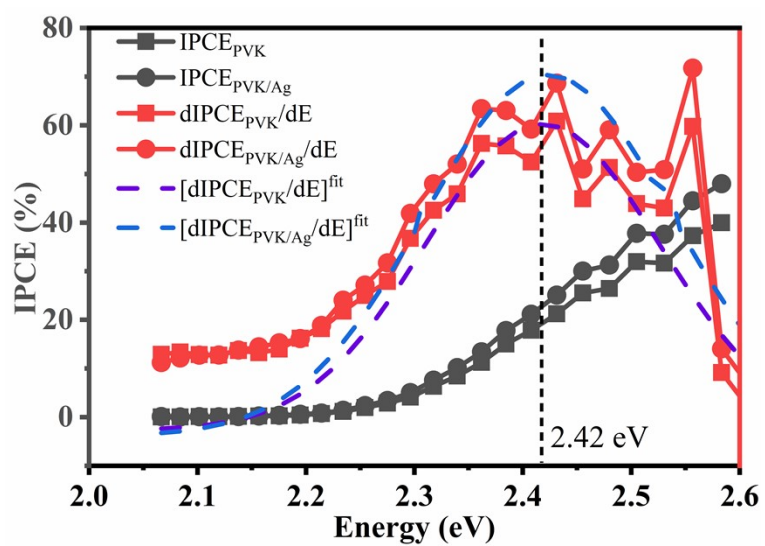

**Fig. S6** Band gap calculation of different perovskite films based on IPCE spectra.

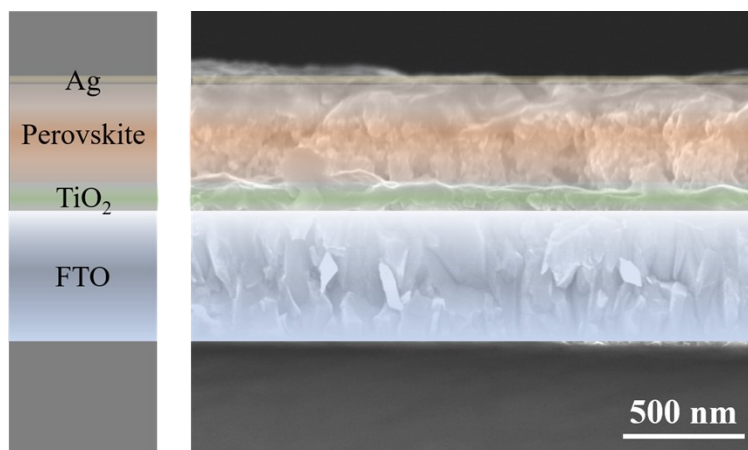

**Fig. S7** Cross-sectional SEM image of PSC device.



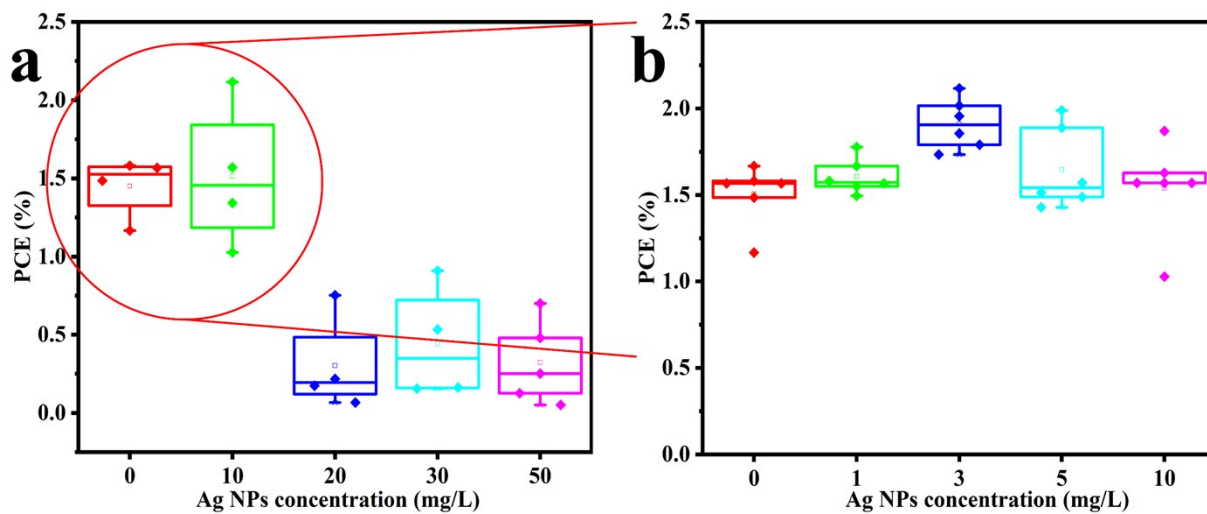

**Fig. S8** PCEs of devices with different concentrations of Ag NPs.

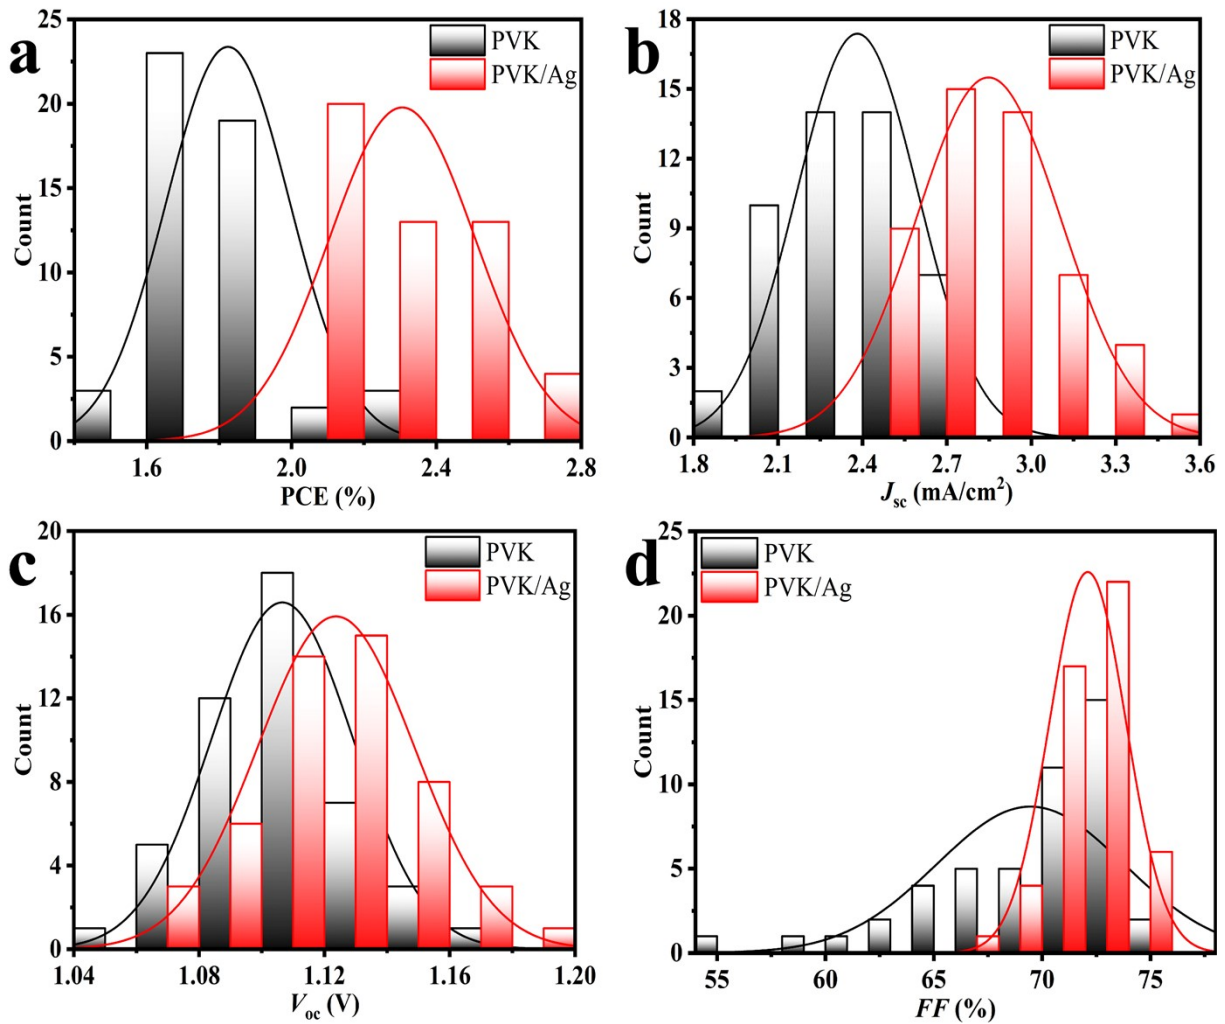

**Fig. S9** Performance distributions of 50 PSCs without and with Ag NPs.

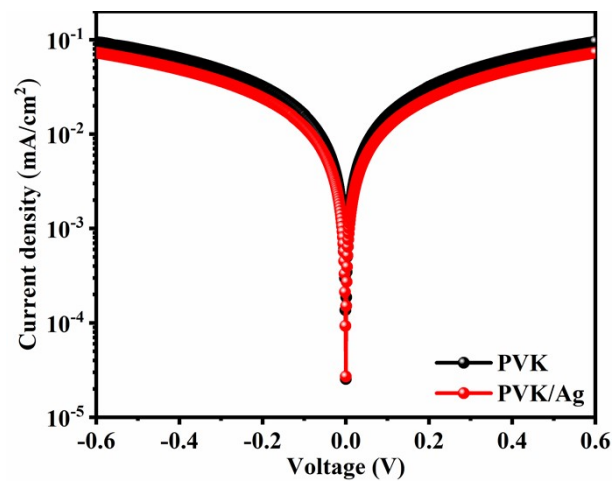

**Fig. S10** Dark J-V plots of PSCs without and with Ag NPs.

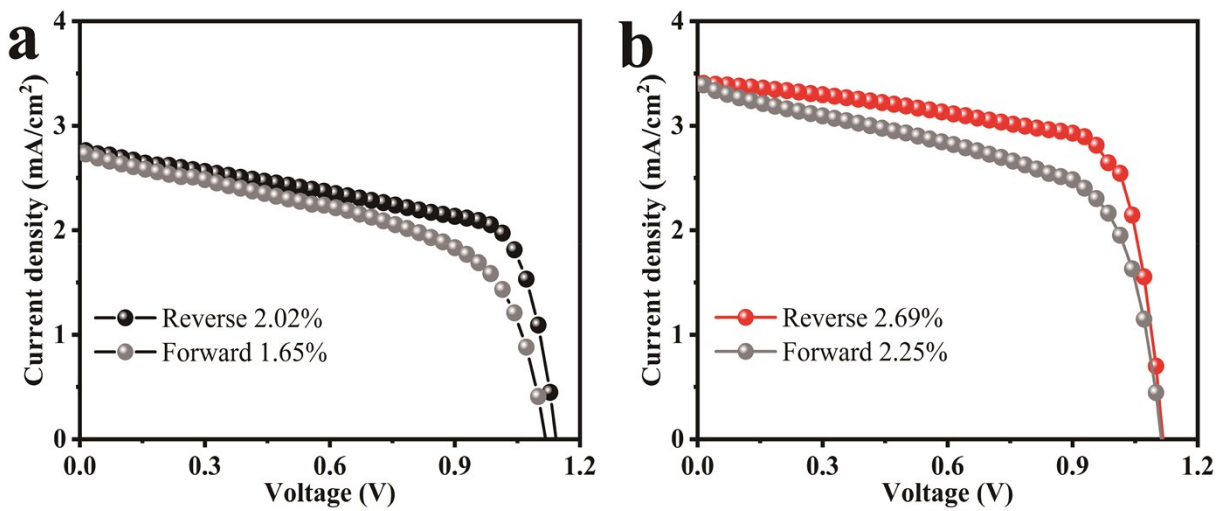

**Fig. S11** Hysteresis characteristics of PSCs without (a) and with (b) Ag NPs.

**Table S1** TRPL decay parameters of perovskite films without and with Ag NPs.

| Perovskite | $A_1$ (%) | $\tau_1$ (ns) | $A_2$ (%) | $\tau_2$ (ns) | $\tau_{ave}$ (ns) |
|------------|-----------|---------------|-----------|---------------|-------------------|
| PVK        | 0.72      | 95.33         | 0.32      | 468.86        | 351.62            |
| PVK/Ag     | 0.66      | 76.49         | 0.39      | 478.29        | 392.71            |

TRPL spectra are fitted with a bi-exponential decay model:  $I_t = I_0 + A_1 \exp(-t/\tau_1) + A_2 \exp(-t/\tau_2)$ , where  $I_0$  is a constant for baseline offset,  $\tau_1$  is the fast component related to trap-assisted non-radiative recombination and  $\tau_2$  is the slow component corresponding to radiative recombination.  $A_1$  and  $A_2$  represent relative amplitudes of fast and slow processes, respectively. The average carrier lifetimes ( $\tau_{ave}$ ) can be calculated by the following equation:  $\tau_{ave} = (A_1 \tau_1^2 + A_2 \tau_2^2) / (A_1 \tau_1 + A_2 \tau_2)$ .

**Table S2** Summary of average photovoltaic parameters of different devices.

| Perovskite | $J_{sc}$ (mA/cm <sup>2</sup> ) | $V_{oc}$ (V)     | $FF$ (%)         | PCE (%)         |
|------------|--------------------------------|------------------|------------------|-----------------|
| PVK        | $2.57 \pm 0.12$                | $1.08 \pm 0.015$ | $68.41 \pm 1.54$ | $1.85 \pm 0.19$ |
| PVK/Ag     | $3.33 \pm 0.08$                | $1.11 \pm 0.013$ | $69.51 \pm 1.23$ | $2.57 \pm 0.12$ |

**Table S3** Summary of photovoltaic parameters for previously reported Cs<sub>2</sub>AgBiBr<sub>6</sub> PSCs.

| Device structure                                                                                                               | $J_{sc}$<br>(mA/cm <sup>2</sup> ) | $V_{oc}$<br>(V) | $FF$<br>(%) | PCE<br>(%) | Ref.      |
|--------------------------------------------------------------------------------------------------------------------------------|-----------------------------------|-----------------|-------------|------------|-----------|
| FTO/c-TiO <sub>2</sub> /m-TiO <sub>2</sub> /Cs <sub>2</sub> AgBiBr <sub>6</sub> /Ag/C                                          | 3.41                              | 1.12            | 0.71        | 2.69       | This work |
| ITO/SnO <sub>2</sub> /Cs <sub>2</sub> AgBiBr <sub>6</sub> /P3HT/Au                                                             | 1.78                              | 1.04            | 0.78        | 1.44       | [1]       |
| FTO/c-TiO <sub>2</sub> /Cs <sub>2</sub> AgBiBr <sub>6</sub> /P3HT/Au                                                           | 1.79                              | 1.12            | 0.68        | 1.37       | [2]       |
| FTO/c-TiO <sub>2</sub> /m-TiO <sub>2</sub> /Cs <sub>2</sub> AgBiBr <sub>6</sub> /Spiro-OMeTAD/Au                               | 3.93                              | 0.98            | 0.63        | 2.43       | [3]       |
| FTO/c-TiO <sub>2</sub> /m-TiO <sub>2</sub> /Cs <sub>2</sub> AgBiBr <sub>6</sub> /N719/Spiro-OMeTAD/Ag                          | 5.13                              | 1.06            | 0.52        | 2.84       | [4]       |
| ITO/Cu-NiO/Cs <sub>2</sub> AgBiBr <sub>6</sub> /C60/BCP/Ag                                                                     | 3.19                              | 1.01            | 0.69        | 2.23       | [5]       |
| FTO/Ti <sub>3</sub> C <sub>2</sub> Tx@TiO <sub>2</sub> /Cs <sub>2</sub> AgBiBr <sub>6</sub> /Spiro-OMeTAD/MoO <sub>3</sub> /Ag | 4.14                              | 0.96            | 0.70        | 2.81       | [6]       |
| FTO/c-TiO <sub>2</sub> /m-TiO <sub>2</sub> /Cs <sub>2</sub> AgBiBr <sub>6</sub> /Spiro-OMeTAD/Au                               | 3.2                               | 1.09            | 0.68        | 2.3        | [7]       |
| FTO/TiO <sub>2</sub> /Cs <sub>2</sub> AgBiBr <sub>6</sub> /Spiro-OMeTAD/MoO <sub>3</sub> /Ag                                   | 3.82                              | 1.01            | 0.65        | 2.51       | [8]       |
| FTO/c-TiO <sub>2</sub> /m-TiO <sub>2</sub> /C-Chl/Cs <sub>2</sub> AgBiBr <sub>6</sub> /Spiro-OMeTAD/Au                         | 4.09                              | 1.04            | 0.73        | 3.11       | [9]       |
| FTO/c-TiO <sub>2</sub> /m-TiO <sub>2</sub> /Cs <sub>1.99</sub> Li <sub>0.01</sub> AgBiBr <sub>6</sub> /C                       | 3.15                              | 1.17            | 0.69        | 2.57       | [10]      |
| FTO/c-TiO <sub>2</sub> /Cs <sub>2</sub> AgBiBr <sub>6</sub> /P3HT/Cu                                                           | 2.58                              | 1.07            | 0.69        | 1.91       | [11]      |
| ITO/SnO <sub>2</sub> /Cs <sub>2</sub> AgBiBr <sub>6</sub> /Spiro-OMeTAD/MoO <sub>3</sub> /ITO                                  | 2.20                              | 0.97            | 0.74        | 1.56       | [12]      |

|                                                                                                                                           |       |      |      |      |      |
|-------------------------------------------------------------------------------------------------------------------------------------------|-------|------|------|------|------|
| FTO/c-TiO <sub>2</sub> /m-TiO <sub>2</sub> /D149/Cs <sub>2</sub> AgBiBr <sub>6</sub> /Spiro-OMeTAD/Ag                                     | 8.24  | 0.73 | 0.70 | 4.23 | [13] |
| FTO/ c-TiO <sub>2</sub> /m-TiO <sub>2</sub> /Cs <sub>2</sub> AgBiBr <sub>6</sub> -1.0MABr / PTB7/ Au                                      | 3.5   | 0.95 | 0.76 | 2.53 | [14] |
| ITO/SnO <sub>2</sub> /Cs <sub>2</sub> AgBiBr <sub>6</sub> /Zn-Chl/Ag                                                                      | 3.83  | 0.99 | 0.74 | 2.79 | [15] |
| FTO/c-TiO <sub>2</sub> /m-TiO <sub>2</sub> /Cs <sub>2</sub> AgBiBr <sub>6</sub> /PMMA/C                                                   | 2.82  | 1.18 | 0.68 | 2.25 | [16] |
| FTO/c-TiO <sub>2</sub> /m-TiO <sub>2</sub> /Cs <sub>2</sub> AgBiBr <sub>6</sub> -GuaSCN/Spiro-OMeTAD/Ag                                   | 5.24  | 1.04 | 0.58 | 3.19 | [17] |
| FTO/c-TiO <sub>2</sub> /m-TiO <sub>2</sub> /Cs <sub>2</sub> AgBiBr <sub>6</sub> / Spiro-OMeTAD /Au                                        | 1.77  | 1.05 | 0.72 | 1.33 | [18] |
| FTO/c-TiO <sub>2</sub> /m-TiO <sub>2</sub> /Cs <sub>2</sub> AgBiBr <sub>6</sub> -(PEA) <sub>4</sub> AgBiBr <sub>8</sub> /Spiro-OMeTAD /Au | 3.50  | 1.07 | 0.66 | 2.47 | [19] |
| FTO/c-TiO <sub>2</sub> /m-TiO <sub>2</sub> /Cs <sub>2</sub> AgBiBr <sub>6</sub> -BMPyr/C                                                  | 2.61  | 1.20 | 0.71 | 2.22 | [20] |
| FTO/c-TiO <sub>2</sub> /Cs <sub>2</sub> AgBiBr <sub>6</sub> /PBDB-T/MoO <sub>x</sub> /Ag                                                  | 3.37  | 1.28 | 0.77 | 3.31 | [21] |
| FTO/m-TiO <sub>2</sub> /Cs <sub>2</sub> AgBiBr <sub>6</sub> /SnS QDs/C                                                                    | 3.74  | 1.02 | 0.51 | 1.95 | [22] |
| ITO/SnO <sub>2</sub> /Hydrogenated-Cs <sub>2</sub> AgBiBr <sub>6</sub> /Spiro-OMeTAD/Au                                                   | 11.40 | 0.92 | 0.61 | 6.37 | [23] |
| FTO/m-TiO <sub>2</sub> /Cs <sub>2</sub> (Ag <sub>0.9</sub> Zn <sub>0.1</sub> )BiBr <sub>6</sub> /C                                        | 4.23  | 1.00 | 0.51 | 2.16 | [24] |
| FTO/c-TiO <sub>2</sub> /m-TiO <sub>2</sub> /Cs <sub>2</sub> AgBiBr <sub>6</sub> -thiourea/Spiro-OMeTAD/Au                                 | 5.14  | 1.03 | 0.58 | 3.07 | [25] |
| FTO/c-TiO <sub>2</sub> /m-TiO <sub>2</sub> /Cs <sub>2</sub> AgBiBr <sub>6</sub> /PyDAnCBZ/Au                                              | 3.73  | 1.06 | 0.74 | 2.92 | [26] |



ITO/SnO<sub>2</sub>/Cs<sub>2</sub>AgBiBr<sub>6</sub>-CBH/Spiro-OMeTAD/Au      2.03      1.05   0.59   1.57   [27]

---

## References

1. C. Wu, Q. Zhang, Y. Liu, W. Luo, X. Guo, Z. Huang, H. Ting, W. Sun, X. Zhong, S. Wei, S. Wang, Z. Chen and L. Xiao, *Adv. Sci.*, 2018, **5**, 1700759.
2. M. Wang, P. Zeng, S. Bai, J. Gu, F. Li, Z. Yang and M. Liu, *Solar RRL*, 2018, **2**, 1800217.
3. E. Greul, Michiel L. Petrus, A. Binek, P. Docampo and T. Bein, *J. Mater. Chem. A*, 2017, **5**, 19972-19981.
4. X. Yang, Y. Chen, P. Liu, H. Xiang, W. Wang, R. Ran, W. Zhou and Z. Shao, *Adv. Funct. Mater.*, 2020, **30**, 2001557.
5. W. Gao, C. Ran, J. Xi, B. Jiao, W. Zhang, M. Wu, X. Hou and Z. Wu, *Chemphyschem*, 2018, **19**, 1696-1700.
6. Z. Li, P. Wang, C. Ma, F. Igbari, Y. Kang, K.-L. Wang, W. Song, C. Dong, Y. Li, J. Yao, D. Meng, Z.-K. Wang and Y. Yang, *J. Am. Chem. Soc.*, 2021, **143**, 2593-2600.
7. N. Daem, J. Dewalque, F. Lang, A. Maho, G. Spronck, C. Henrist, P. Colson, S. D. Stranks and R. Cloots, *Solar RRL*, 2021, **5**, 2100422.
8. F. Igbari, R. Wang, Z.-K. Wang, X.-J. Ma, Q. Wang, K.-L. Wang, Y. Zhang, L.-S. Liao and Y. Yang, *Nano Lett.*, 2019, **19**, 2066-2073.
9. B. Wang, N. Li, L. Yang, C. Dall'Agnese, A. K. Jena, S.-i. Sasaki, T. Miyasaka, H. Tamiaki and X.-F. Wang, *J. Am. Chem. Soc.*, 2021, **143**, 2207-2211.
10. J. Li, J. Duan, J. Du, X. Yang, Y. Wang, P. Yang, Y. Duan and Q. Tang, *ACS Appl. Mater. Interfaces*, 2020, **12**, 47408-47415.
11. M. Ghasemi, L. Zhang, J.-H. Yun, M. Hao, D. He, P. Chen, Y. Bai, T. Lin, M. Xiao, A. Du, M. Lyu and L. Wang, *Adv. Funct. Mater.*, 2020, **30**, 2002342.
12. G. Liu, C. Wu, Z. Zhang, Z. Chen, L. Xiao and B. Qu, *Solar RRL*, 2020, **4**, 2000056.
13. B. Wang, N. Li, L. Yang, C. Dall'Agnese, A. K. Jena, T. Miyasaka and X.-F. Wang, *J. Am. Chem. Soc.*, 2021, **143**, 14877-14883.
14. H. Wu, Y. Wang, A. Liu, J. Wang, B. J. Kim, Y. Liu, Y. Fang, X. Zhang, G. Boschloo and E. M. J. Johansson, *Adv. Funct. Mater.*, 2022, **32**, 2109402.
15. B. Wang, L. Yang, C. Dall'Agnese, A. K. Jena, S.-i. Sasaki, T. Miyasaka, H. Tamiaki and X.-F. Wang, *Solar RRL*, 2020, **4**, 2000166.

16. J. Li, F. Yan, P. Yang, Y. Duan, J. Duan and Q. Tang, *Solar RRL*, 2022, **6**, 2100791.
17. X. Yang, A. Xie, H. Xiang, W. Wang, R. Ran, W. Zhou and Z. Shao, *Appl. Phys. Rev.*, 2021, **8**, 041402.
18. D. Zhao, C. Liang, B. Wang, T. Liu, Q. Wei, K. Wang, H. Gu, S. Wang, S. Mei and G. Xing, *Energy Environ. Mater.*, 2022, **5**, 1317-1322.
19. M. T. Sirtl, R. Hooijer, M. Armer, F. G. Ebadi, M. Mohammadi, C. Maheu, A. Weis, B. T. van Gorkom, S. Häringer, R. A. J. Janssen, T. Mayer, V. Dyakonov, W. Tress and T. Bein, *Adv. Energy Mater.*, 2022, **12**, 2103215.
20. J. Li, X. Meng, Z. Wu, Y. Duan, R. Guo, W. Xiao, Y. Zhang, Y. Li, Y. Shen, W. Zhang and G. Shao, *Adv. Funct. Mater.*, 2022, **32**, 2112991.
21. B. Li, X. Wu, S. Zhang, Z. Li, D. Gao, X. Chen, S. Xiao, C.-C. Chueh, A. K. Y. Jen and Z. Zhu, *Chem. Eng. J.*, 2022, **446**, 137144.
22. Y. Ou, J. Lu, X. Zhong, X. Li, S. Wu, P. Chen and L. Zhou, *Mater. Lett.*, 2022, **312**, 131672.
23. Z. Zhang, Q. Sun, Y. Lu, F. Lu, X. Mu, S.-H. Wei and M. Sui, *Nat. Commun.*, 2022, **13**, 3397.
24. Y. Ou, Z. Lu, J. Lu, X. Zhong, P. Chen, L. Zhou and T. Chen, *Opt. Mater.*, 2022, **129**, 112452.
25. X. Yang, H. Xiang, J. Huang, C. Zhou, R. Ran, W. Wang, W. Zhou and Z. Shao, *J. Colloid Interface Sci.*, 2022, **628**, 476-485.
26. P. Huang, M. Sheokand, D. Payno Zarceño, S. Kazim, L. Lezama, M. K. Nazeeruddin, R. Misra and S. Ahmad, *ACS Appl. Energy Mater.*, 2023, **6**, 7955-7964.
27. Y. Fan, F. Qiao, D. Du, J. Bao, J. Liang, H. Liu and W. Shen, *ACS Appl. Mater. Interfaces*, 2023, **15**, 36233-36241.
